# Supplementary material for: Estimating Air Temperature and Its Influence on Malaria Transmission across Africa
Source: PLoS One. 2013 Feb 20;8(2):e56487. doi: 10.1371/journal.pone.0056487 (PMC3577915; doi:10.1371/journal.pone.0056487)
Supplement: Calculation S1 — Example demonstrating how to calculate time series from the Fourier transforms published in Datasets S1 and S2 as an R script. (R) [file pone.0056487.s007.r]

# parameters used in the Fourier Transform:
nyears = 4 # used 4 years of data to calculate the Fourier Transform
ppyear = 64 # used a time step of 64 points per year in the input data to calculate the Fourier Transforms.

# reading in the Fourier Transform data file:
FT = read.table("FT_2003-2006_64ppyear_ERAday_0_1deg_255721.txt",header=T)

# selecting a number of locations for which to evaluate the time series:
# (skip if you want to calculate the whole file)
FT = FT[1:10,]

# specifying the time points throughout the year
# for which to calculate the time series.
# here: daily time step
timepoints = (1:365)/365

# calculating the constant term (=annual mean) for each location and time point:
TS0 = matrix(FT$H0/(nyears*ppyear),nrow=nrow(FT),ncol=length(timepoints))
# calculating the time series based on
# constant term H0 and annual mode H1:
TS1 = TS0 + 1/(nyears*ppyear)*(outer(FT$ReH1,cos(2*pi*timepoints*1))+outer(FT$ImH1,sin(2*pi*timepoints*1)))
# calculating the time series based on
# constant term H0, annual mode H1 and biannual mode H2
TS2 = TS1 + 1/(nyears*ppyear)*(outer(FT$ReH2,cos(2*pi*timepoints*2))+outer(FT$ImH2,sin(2*pi*timepoints*2)))


# plotting the reconstructed time series for a selected location:
i=1
plot(timepoints, TS0[i,], type="l",lwd=2,ylim=range(c(TS0[i,],TS1[i,],TS2[i,])),xlab="time throughout the year",ylab="Temperature in Celsius",main="")
lines(timepoints, TS1[i,],col=2,lwd=2)
lines(timepoints, TS2[i,],col=3,lwd=3)
legend("bottomright",col=1:3,lwd=2,legend=c("constant term H0","constant term H0 and annual mode H1","constant term H0, annual mode H1 and biannual mode H2"))
title(main=paste("Reconstructed time series \nfor longitude ",FT$longitude[i]," and latitude ",FT$latitude[i],sep=""))
